# Supplementary material for: Factors That Affect Large Subunit Ribosomal DNA Amplicon Sequencing Studies of Fungal Communities: Classification Method, Primer Choice, and Error
Source: PubMed Central journal article supplement (PMC3338786; doi:10.1371/journal.pone.0035749), 2012-04-27

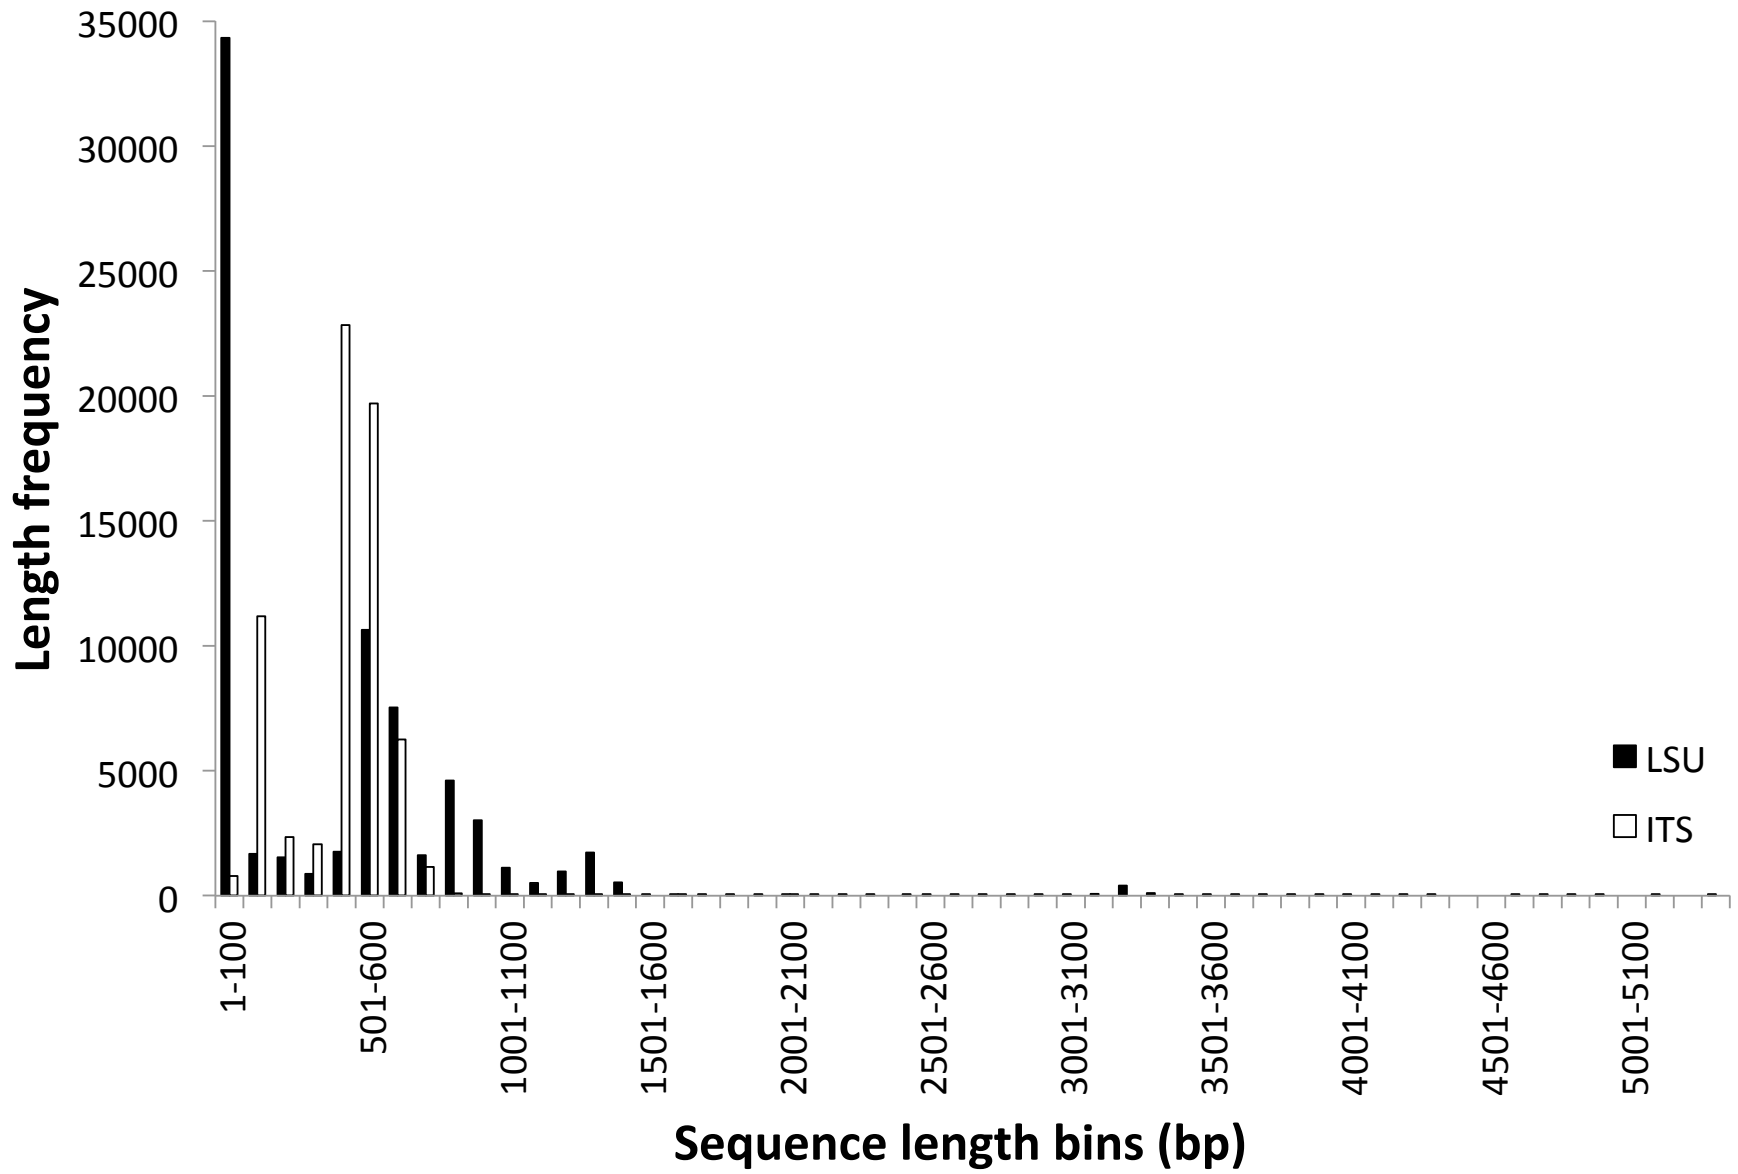

Supplement: pone.0035749.s002.pdf [file pone.0035749.s002.pdf]
